# Supplementary material for: Defect formation and ambivalent effects on electrochemical performance in layered sodium titanate Na2Ti3O7
Source: Royal Society of Chemistry journal article supplement (doi:10.1039/d2cp05403e), 2023-01-01
Supplement: d2cp05403e1.pdf [file d2cp05403e1.pdf]

## Electronic Supplementary Information – Defect formation and ambivalent effects on electrochemical performance in layered sodium titanate $\text{Na}_2\text{Ti}_3\text{O}_7$

Yong-Chol Pak, Chung-Hyok Rim, Suk-Gyong Hwang, Kum-Chol Ri, Chol-Jun Yu\*

*Chair of Computational Materials Design (CMD), Faculty of Materials Science, Kim Il Sung University,  
 Pyongyang, PO Box 76, Democratic People's Republic of Korea*

Table S1. Lattice constants ( $a, b, c$ ) and lattice angle ( $\beta$ ,  $\alpha = \gamma = 90^\circ$ ), unit cell volume (Vol) and band gap ( $E_g$ ) with each relative error (err) for  $\text{Na}_2\text{Ti}_3\text{O}_7$  unit cell, according the value of Hubbard parameter  $U$  with PBE+vdW functional and different XC functional of PBEsol with and without vdW.

| XC                | U (eV) | $a$ (Å) | err (%) | $b$ (Å) | err (%) | $c$ (Å) | err (%) | $\beta$ (deg) | err (%) | Vol (Å <sup>3</sup> ) | err (%) | $E_g$ (eV) | $\Delta E$ (eV) |
|-------------------|--------|---------|---------|---------|---------|---------|---------|---------------|---------|-----------------------|---------|------------|-----------------|
| PBE+              | 0.0    | 9.1227  | -0.04   | 3.7876  | -0.32   | 8.5389  | -0.29   | 101.944       | 0.34    | 288.6634              | -0.90   | 3.15       | -0.58           |
| vdW               | 0.5    | 9.1277  | 0.02    | 3.7944  | -0.14   | 8.5416  | -0.25   | 101.925       | 0.33    | 289.4444              | -0.63   | 3.19       | -0.54           |
|                   | 1.0    | 9.1336  | 0.08    | 3.8015  | 0.05    | 8.5440  | -0.23   | 101.915       | 0.32    | 290.6667              | -0.21   | 3.24       | -0.49           |
|                   | 1.5    | 9.1397  | 0.15    | 3.8087  | 0.24    | 8.5462  | -0.20   | 101.905       | 0.31    | 291.0952              | -0.07   | 3.29       | -0.44           |
|                   | 2.0    | 9.1469  | 0.23    | 3.8160  | 0.43    | 8.5479  | -0.18   | 101.896       | 0.30    | 291.9525              | 0.23    | 3.34       | -0.39           |
|                   | 2.2    | 9.1483  | 0.24    | 3.8191  | 0.51    | 8.5496  | -0.16   | 101.890       | 0.29    | 292.3012              | 0.35    | 3.35       | -0.38           |
|                   | 2.4    | 9.1510  | 0.27    | 3.8221  | 0.59    | 8.5506  | -0.15   | 101.885       | 0.29    | 292.6576              | 0.47    | 3.37       | -0.36           |
|                   | 2.6    | 9.1537  | 0.30    | 3.8252  | 0.67    | 8.5519  | -0.13   | 101.881       | 0.28    | 293.024               | 0.60    | 3.39       | -0.34           |
|                   | 2.8    | 9.1571  | 0.34    | 3.8268  | 0.71    | 8.5563  | -0.08   | 101.868       | 0.27    | 293.4245              | 0.73    | 3.44       | -0.29           |
|                   | 3.0    | 9.1598  | 0.37    | 3.8297  | 0.79    | 8.5573  | -0.07   | 101.871       | 0.27    | 293.7643              | 0.85    | 3.46       | -0.27           |
|                   | 3.2    | 9.1627  | 0.40    | 3.8328  | 0.87    | 8.5589  | -0.05   | 101.864       | 0.27    | 294.1534              | 0.98    | 3.48       | -0.25           |
|                   | 3.4    | 9.1655  | 0.43    | 3.8359  | 0.95    | 8.5600  | -0.04   | 101.861       | 0.26    | 294.5247              | 1.11    | 3.50       | -0.23           |
|                   | 3.6    | 9.1686  | 0.47    | 3.8390  | 1.03    | 8.5607  | -0.03   | 101.853       | 0.26    | 294.8980              | 1.24    | 3.52       | -0.21           |
|                   | 3.8    | 9.1717  | 0.50    | 3.8421  | 1.12    | 8.5620  | -0.02   | 101.848       | 0.25    | 295.2843              | 1.37    | 3.54       | -0.19           |
|                   | 4.0    | 9.1748  | 0.53    | 3.8453  | 1.20    | 8.5633  | 0.00    | 101.843       | 0.25    | 295.6789              | 1.51    | 3.56       | -0.17           |
| PBE               | 3.0    | 9.2754  | 1.64    | 3.8503  | 1.33    | 8.6837  | 1.40    | 101.685       | 0.09    | 303.6946              | 4.26    | 3.39       | -0.34           |
| PBEsol            | 3.0    | 9.1521  | 0.29    | 3.8227  | 0.61    | 8.5855  | 0.26    | 101.740       | 0.14    | 294.0872              | 0.96    | 3.42       | -0.31           |
| PBEsol+<br>vdW    | 3.0    | 9.0453  | -0.88   | 3.8004  | 0.02    | 8.4695  | -1.10   | 101.891       | 0.29    | 284.8992              | -2.19   | 3.49       | -0.24           |
| Exp. <sup>a</sup> |        | 9.1260  |         | 3.7997  |         | 8.5634  |         | 101.593       |         |                       |         | 3.73       |                 |
| Exp. <sup>b</sup> |        | 9.1281  |         | 3.8022  |         | 8.5625  |         | 101.603       |         | 291.29                |         | 3.51       |                 |

<sup>a</sup>Ref. [1]

<sup>b</sup>Ref. [2]

Table S2. Pseudopotential file name, valence electron configuration and total energy of isolated atoms, phase, total energy of elementary substances, and binding energy per atom.  $E_{\text{bind}} = (E_{\text{tot}}^{\text{sub}} - NE_{\text{tot}}^{\text{atom}})/N$ , where  $N$  is the number of atoms included in the elementary substance. Values in parenthesis are experimental ones [3].

| Element | Pseudopotential      | Configuration            | $E_{\text{tot}}^{\text{atom}}$ (Ry) | Phase | $E_{\text{tot}}^{\text{sub}}$ (Ry) | $E_{\text{bind}}$ (eV/atom) |
|---------|----------------------|--------------------------|-------------------------------------|-------|------------------------------------|-----------------------------|
| H       | H.pbe-van_ak.UPF     | $1s^1$                   | -0.91703472                         | gas   | -2.33054856                        | -3.3775                     |
| O       | O.pbe-van_ak.UPF     | $2s^22p^4$               | -31.55407991                        | gas   | -63.85222829                       | -5.0618 (-5.12)             |
| Li      | Li.pbe-s-van_ak.UPF  | $1s^22s^{0.95}2p^{0.05}$ | -14.57961031                        | bcc   | -29.44901619                       | -1.9715                     |
| Na      | Na.pbe-sp-van_ak.UPF | $2s^22p^63s^1$           | -96.04691566                        | bcc   | -192.30620110                      | -1.4447                     |
| K       | K.pbe-sp-van.UPF     | $3s^23p^64s^1$           | -57.13828878                        | bcc   | -114.42571753                      | -1.0146                     |
| Rb      | rb.pbe_v1.uspp.F.UPF | $4s^24p^65s^{0.5}$       | -53.09506539                        | bcc   | -106.32626483                      | -0.9261                     |
| Ti      | Ti.pbe-sp-van_ak.UPF | $3s^23p^64s^23d^2$       | -116.21833062                       | hcp   | -349.47942556                      | -3.7390                     |

\*Corresponding author: Chol-Jun Yu, Email: cj.yu@ryongnamsan.edu.kp

Table S3. Crystal system, space group, total energy, and formation energy per O<sub>2</sub> of binary metal oxides.  $E_{\text{form}}(\text{M}_a\text{O}_b) = [E_{\text{tot}}(\text{M}_a\text{O}_b) - aE_{\text{tot}}(\text{M}) - b/2E_{\text{tot}}(\text{O}_2)] \cdot 2/b$ , where  $E_{\text{tot}}(\text{M})$  is the total energy of elementary metal per atom and  $E_{\text{tot}}(\text{O}_2)$  is the total energy of isolated O<sub>2</sub> molecule. Experimental values are from Ref. [4].

| Compound                       | Structure    | Space group  | $E_{\text{tot}}$ (Ry) | $E_{\text{form}}$ (eV/O <sub>2</sub> ) |          |
|--------------------------------|--------------|--------------|-----------------------|----------------------------------------|----------|
|                                |              |              |                       | Cal.                                   | Exp.     |
| Superoxide                     |              |              |                       |                                        |          |
| LiO <sub>2</sub>               | cubic        | $Fm\bar{3}m$ | -314.48820427         | -0.6165                                | -        |
| NaO <sub>2</sub>               | cubic        | $Fm\bar{3}m$ | -640.88614287         | -2.9417                                |          |
|                                | orthorhombic | $Pnmm$       | -320.46159754         | -3.0677                                |          |
|                                | cubic        | $Pa\bar{3}$  | -640.90653854         | -3.0110                                |          |
| KO <sub>2</sub>                | hexagonal    | $R\bar{3}m$  | -480.64680752         | -2.8609                                | -2.6950  |
|                                |              | $C12c1$      | -485.13970635         | -2.9911                                |          |
|                                |              | $F4mmm$      | -485.24565685         | -3.3515                                |          |
|                                |              | $I4mmm$      | -242.62272452         | -3.3508                                | -2.9508  |
| RbO <sub>2</sub>               | cubic        | $Fm\bar{3}m$ | -233.89551457         | 0.9198                                 |          |
|                                |              | $I4mmm$      | -234.52715354         | -3.3772                                | -2.8866  |
| Peroxide                       |              |              |                       |                                        |          |
| Li <sub>2</sub> O <sub>2</sub> | hexagonal    | $P6_3/mmc$   | -187.60021477         | -6.7874                                | -6.5697  |
| Na <sub>2</sub> O <sub>2</sub> | hexagonal    | $P62m$       | -769.65319364         | -5.3421                                | -5.2916  |
| K <sub>2</sub> O <sub>2</sub>  |              | $Cmca$       | -714.65068764         | -5.2345                                | -5.1176  |
| Rb <sub>2</sub> O <sub>2</sub> |              | $Immm$       | -341.12271964         | -5.2092                                | -4.8887  |
| Oxide                          |              |              |                       |                                        |          |
| Li <sub>2</sub> O              | cubic        | $Fm\bar{3}m$ | -247.43533953         | -13.1624                               |          |
|                                | hexagonal    | $R3\bar{m}h$ | -185.57950678         | -13.1896                               | -12.3854 |
| Na <sub>2</sub> O              | cubic        | $Fm\bar{3}m$ | -898.28499053         | -9.2229                                | -8.5801  |
| K <sub>2</sub> O               | cubic        | $Fm\bar{3}m$ | -586.55663718         | -7.8187                                | -7.4884  |
| Rb <sub>2</sub> O              | cubic        | $Fm\bar{3}m$ | -554.11294202         | -7.5065                                | -7.0224  |
| TiO                            | cubic        | $Fm\bar{3}m$ | -595.0146926          | -9.1000                                |          |
|                                | monoclinic   | $C2/m$       | -743.8754339          | -9.6827                                |          |
| TiO <sub>2</sub>               |              |              | -743.8779393          | -9.6964                                | -10.7655 |
|                                | monoclinic   | $C2/m$       | -724.0974288          | -9.2382                                |          |
|                                | tetragonal   | $I4_1/amd$   | -362.0508892          | -9.2530                                |          |
|                                | monoclinic   | $P2_1/c$     | -724.0739579          | -9.1583                                |          |
|                                | tetragonal   | $P4_2/mnm$   | -362.0443419          | -9.2084                                |          |
|                                | orthorhombic | $Pbca$       | -1448.2300363         | -9.2980                                |          |
|                                | orthorhombic | $Pbcn$       | -724.1290851          | -9.3458                                | -9.7774  |
| Ti <sub>2</sub> O <sub>3</sub> | hexagonal    | $R\bar{3}c$  | -659.7025193          | -9.8563                                | -10.5018 |
| Ti <sub>3</sub> O <sub>5</sub> | monoclinic   | $C2/c$       | -1021.8435757         | -9.8604                                |          |
|                                | monoclinic   | $C2/m$       | -1021.7055992         | -9.4849                                |          |
|                                | orthorhombic | $Cmcm$       | -1021.6864610         | -9.4328                                | -10.1892 |

Table S4. Crystal system with space group, total energy, and formation energy of sodium oxides calculated using oxygen gas and sodium metal as two end materials, and corrected formation energy.  $E_{\text{form}} = \frac{1}{a+b}E_{\text{tot}}(\text{M}_a\text{O}_b) - [xE_{\text{tot}}(\text{M}) - (1-x)E_{\text{tot}}(\text{O}_2)/2]$ , where  $x = a/(a+b)$ . The correcting term  $E_{\text{corr}}$  is determined from  $E_{\text{corr}}^0$  shown in Fig. S1 by using the relation  $E_{\text{corr}} = E_{\text{corr}}^0(1-x)/2$ , and then, the corrected formation energy is obtained by  $E_{\text{form}}^{\text{corr}} = E_{\text{form}} - E_{\text{corr}}$ .

| $\text{M}_a\text{O}_b$         | phase                     | $a$ | $b$ | $x = a/(a+b)$ | $E_{\text{tot}}(\text{M}_a\text{O}_b)$ (Ry) | $E_{\text{form}}$ (eV) | $E_{\text{corr}}$ (eV) | $E_{\text{form}}^{\text{corr}}$ (eV) |
|--------------------------------|---------------------------|-----|-----|---------------|---------------------------------------------|------------------------|------------------------|--------------------------------------|
| O <sub>2</sub>                 | gas                       | 0   | 2   | 0.0           | -63.85222829                                | 0.0000                 |                        | 0.0000                               |
| NaO <sub>3</sub>               | orthorhombic ( $Imm2$ )   | 1   | 3   | 1/4           | -192.122132689                              | -0.6486                |                        | -0.6486                              |
| NaO <sub>2</sub>               | cubic ( $Fm\bar{3}m$ )    | 1   | 2   | 1/3           | -160.221535717                              | -0.9806                | -0.1404                | -0.8401                              |
|                                | orthorhombic ( $Pnmm$ )   |     |     |               | -160.236595150                              | -1.0489                |                        | -0.9084                              |
|                                | cubic ( $P\bar{a}3$ )     |     |     |               | -160.215602507                              | -0.9537                |                        | -0.8132                              |
|                                | hexagonal ( $R\bar{3}m$ ) |     |     |               | -160.230798769                              | -1.0226                |                        | -0.8822                              |
| Na <sub>2</sub> O <sub>2</sub> | hexagonal ( $P62m$ )      | 2   | 2   | 1/2           | -256.551064545                              | -1.3355                | -0.0441                | -1.2914                              |
| Na <sub>2</sub> O              | cubic ( $Fm\bar{3}m$ )    | 2   | 1   | 2/3           | -224.571247632                              | -1.5372                | -0.0942                | -1.4429                              |
| Na                             | cubic ( $bcc$ )           | 1   | 0   | 1.0           | -96.153100550                               | 0.0000                 |                        | 0.0000                               |

Table S5. Crystal system with space group, total energy, and formation energy of titanium oxides calculated using oxygen gas and titanium metal as two end materials.  $E_{\text{form}} = \frac{1}{a+b} E_{\text{tot}}(\text{M}_a\text{O}_b) - [xE_{\text{tot}}(\text{M}) - (1-x)E_{\text{tot}}(\text{O}_2)/2]$ , where  $x = a/(a+b)$ .

| $\text{M}_a\text{O}_b$     | phase                      | $a$ | $b$ | $x = a/(a+b)$ | $E_{\text{tot}}(\text{M}_a\text{O}_b)$ (Ry) | $E_{\text{form}}$ (eV) |
|----------------------------|----------------------------|-----|-----|---------------|---------------------------------------------|------------------------|
| $\text{O}_2$               | gas                        | 0   | 2   | 0.0           | -63.85222547                                | 0.0000                 |
| $\text{TiO}_2$             | monoclinic ( $C2/m$ )      | 1   | 2   | 0.3333        | -181.02435720                               | -3.2039                |
|                            | tetragonal ( $I4_1/amd$ )  |     |     |               | -181.02544461                               | -3.2088                |
|                            | monoclinic ( $P2_1/c$ )    |     |     |               | -181.01848948                               | -3.1773                |
|                            | tetragonal ( $P4_2/mnm$ )  |     |     |               | -181.02217096                               | -3.1940                |
|                            | orthorhombic ( $Pbca$ )    |     |     |               | -181.02875453                               | -3.2238                |
|                            | orthorhombic ( $Pbcn$ )    |     |     |               | -181.03227127                               | -3.2398                |
| $\text{Ti}_9\text{O}_{17}$ | triclinic ( $P\bar{1}$ )   | 9   | 17  | 0.3462        | -1597.07044234                              | -3.2106                |
| $\text{Ti}_8\text{O}_{15}$ | triclinic ( $P\bar{1}$ )   | 8   | 15  | 0.3478        | -1416.03700819                              | -3.2061                |
| $\text{Ti}_7\text{O}_{13}$ | triclinic ( $P\bar{1}$ )   | 7   | 13  | 0.3500        | -1235.00172357                              | -3.1990                |
| $\text{Ti}_6\text{O}_{11}$ | monoclinic ( $C2/m$ )      | 6   | 11  | 0.3529        | -1053.94010619                              | -3.1683                |
| $\text{Ti}_5\text{O}_9$    | triclinic ( $P\bar{1}$ )   | 5   | 9   | 0.3571        | -872.93708920                               | -3.1814                |
|                            | triclinic ( $P\bar{1}$ )   | 10  | 18  |               | -1745.91065854                              | -3.1992                |
| $\text{Ti}_4\text{O}_7$    | triclinic ( $P\bar{1}$ )   | 4   | 7   | 0.3636        | -691.89925787                               | -3.1586                |
| $\text{Ti}_3\text{O}_5$    | monoclinic ( $C2/c$ )      | 3   | 5   | 0.3750        | -510.92178785                               | -3.2214                |
|                            | monoclinic ( $C2/m$ )      |     |     |               | -510.85279962                               | -3.1041                |
|                            | orthorhombic ( $Cmcm$ )    |     |     |               | -510.84323050                               | -3.0878                |
| $\text{Ti}_2\text{O}_3$    | hexagonal ( $R\bar{3}c$ )  | 2   | 3   | 0.4000        | -329.85125963                               | -3.1063                |
| $\text{TiO}$               | monoclinic ( $C2/m$ )      | 5   | 5   | 0.5000        | -743.87793933                               | -2.6108                |
|                            | monoclinic ( $C2/m$ )      | 1   | 1   | 0.5000        | -148.77508678                               | -2.6074                |
|                            | cubic ( $Fm\bar{3}m$ )     | 1   | 1   | 0.5000        | -148.75367315                               | -2.4617                |
| $\text{Ti}_2\text{O}$      | hexagonal ( $P\bar{3}m1$ ) | 2   | 1   | 0.6667        | -265.22033661                               | -1.6456                |
| $\text{Ti}_3\text{O}$      | hexagonal ( $P312$ )       | 3   | 1   | 0.7500        | -381.70674692                               | -1.3046                |
|                            | hexagonal ( $P\bar{3}1c$ ) |     |     |               | -381.70724216                               | -1.3063                |
| $\text{Ti}_6\text{O}$      | hexagonal ( $P\bar{3}1m$ ) | 6   | 1   | 0.8571        | -731.07077997                               | -0.6813                |
| $\text{Ti}$                | hexagonal ( $hcp$ )        | 1   | 0   | 1.0           | -116.46569363                               | 0.0000                 |

Table S6. Oxygen chemical potential  $\Delta\mu_{\text{O}}(T, p)$  as increasing temperature  $T$  from 300 K to 1500 K with the experimental data of entropy  $S^\circ$ , enthalpy difference  $H^\circ(T) - H^\circ(T_r)$ , and  $H^\circ(T_r) - H^\circ(0) = 0.0899$  eV available from Ref. [4], where the reference temperature is  $T_r = 298.15$  K. Here,  $\Delta\mu_{\text{O}}(T, p)$  is evaluated at the pressure values of  $p = p_\circ = 1$  atm and  $p = 0.2$  atm, respectively.

| $T$     |        | $S^\circ$ | $H^\circ(T) - H^\circ(T_r)$ | $TS^\circ$ | $\Delta\mu_{\text{O}}(T, p_\circ)$ |         | $k_{\text{B}}T$ | $\frac{1}{2}k_{\text{B}}T \ln(p/p_\circ)$ | $\Delta\mu_{\text{O}}(T, p)$ |
|---------|--------|-----------|-----------------------------|------------|------------------------------------|---------|-----------------|-------------------------------------------|------------------------------|
| (°C)    | (K)    | (J/mol·K) | (kJ/mol)                    | (kJ/mol)   | (kJ/mol)                           | (eV)    | (eV)            | (eV)                                      | (eV)                         |
| 25      | 298.15 | 205.148   | 0.000                       | 61.1649    | -26.2424                           | -0.2718 | 0.0257          | -0.0207                                   | -0.2925                      |
| 26.85   | 300    | 205.330   | 0.054                       | 61.5990    | -26.4325                           | -0.2738 | 0.0259          | -0.0208                                   | -0.2946                      |
| 126.85  | 400    | 213.873   | 3.026                       | 85.5492    | -36.9216                           | -0.3824 | 0.0345          | -0.0277                                   | -0.4102                      |
| 226.85  | 500    | 220.695   | 6.085                       | 110.3475   | -47.7913                           | -0.4950 | 0.0431          | -0.0347                                   | -0.5297                      |
| 326.85  | 600    | 226.454   | 9.245                       | 135.8724   | -58.9737                           | -0.6108 | 0.0517          | -0.0416                                   | -0.6524                      |
| 426.85  | 700    | 231.470   | 12.500                      | 162.0290   | -70.4245                           | -0.7294 | 0.0603          | -0.0485                                   | -0.7780                      |
| 526.85  | 800    | 235.925   | 15.838                      | 188.7400   | -82.1110                           | -0.8505 | 0.0689          | -0.0555                                   | -0.9059                      |
| 626.85  | 900    | 239.937   | 19.244                      | 215.9433   | -94.0097                           | -0.9737 | 0.0776          | -0.0624                                   | -1.0361                      |
| 726.85  | 1000   | 243.585   | 22.707                      | 243.5850   | -106.0990                          | -1.0989 | 0.0862          | -0.0693                                   | -1.1683                      |
| 826.85  | 1100   | 246.930   | 26.217                      | 271.6230   | -118.3630                          | -1.2259 | 0.0948          | -0.0763                                   | -1.3022                      |
| 926.85  | 1200   | 250.019   | 29.768                      | 300.0228   | -130.7874                          | -1.3546 | 0.1034          | -0.0832                                   | -1.4378                      |
| 1026.85 | 1300   | 252.888   | 33.352                      | 328.7544   | -143.3612                          | -1.4849 | 0.1120          | -0.0901                                   | -1.5750                      |
| 1126.85 | 1400   | 255.568   | 36.968                      | 357.7952   | -156.0736                          | -1.6165 | 0.1206          | -0.0971                                   | -1.7136                      |
| 1226.85 | 1500   | 258.081   | 40.611                      | 387.1215   | -168.9153                          | -1.7495 | 0.1293          | -0.1040                                   | -1.8536                      |

Table S7. Oxygen chemical potential  $\Delta\mu_{\text{O}}(T, p)$  as decreasing oxygen partial pressure  $p$  from  $10^{10}$  atm to  $10^{-20}$  atm at temperatures of  $T = 1100$  K and  $700$  K, respectively.

| $p$        |            | $\frac{1}{2}k_{\text{B}}T \ln(p/p_{\circ})$<br>(eV) | $\Delta\mu_{\text{O}}(T, p)$ |                 |
|------------|------------|-----------------------------------------------------|------------------------------|-----------------|
| (Pa)       | (atm)      |                                                     | $T = 1100$ K<br>(eV)         | $700$ K<br>(eV) |
| $10^{15}$  | $10^{10}$  | 1.0913                                              | -0.1346                      | 0.3619          |
| $10^{12}$  | $10^7$     | 0.7639                                              | -0.4620                      | 0.0345          |
| $10^9$     | $10^4$     | 0.4365                                              | -0.7894                      | -0.2929         |
| $10^6$     | $10^1$     | 0.1091                                              | -1.1168                      | -0.6203         |
| $10^3$     | $10^{-2}$  | -0.2183                                             | -1.4442                      | -0.9477         |
| $10^0$     | $10^{-5}$  | -0.5457                                             | -1.7716                      | -1.2751         |
| $10^{-3}$  | $10^{-8}$  | -0.8731                                             | -2.0990                      | -1.6025         |
| $10^{-6}$  | $10^{-11}$ | -1.2005                                             | -2.4264                      | -1.9299         |
| $10^{-9}$  | $10^{-14}$ | -1.5278                                             | -2.7538                      | -2.2573         |
| $10^{-12}$ | $10^{-17}$ | -1.8552                                             | -3.0812                      | -2.5847         |
| $10^{-15}$ | $10^{-20}$ | -2.1826                                             | -3.4086                      | -2.9121         |

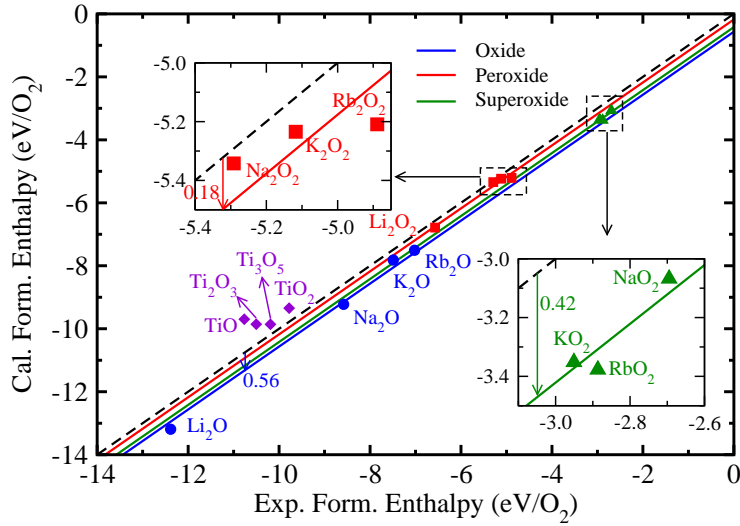

Figure S1. The calculated formation enthalpy versus experimental formation enthalpy for alkali metal oxides and titanium oxides. For alkali metal oxides, systematic differences are found, giving the correction energy for oxide formation energy  $E_{\text{oxd}}^{\text{cor}} = 0.42, 0.18,$  and  $0.56$  eV per  $\text{O}_2$  for superoxide, peroxide and oxide, respectively.

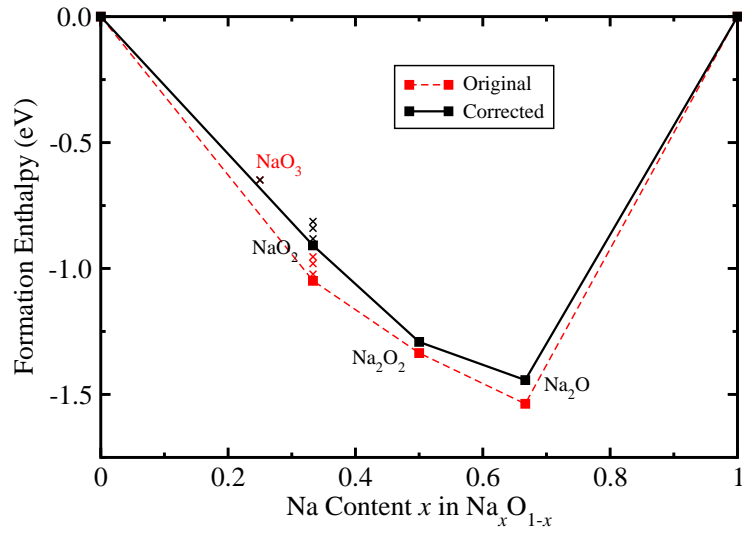

Figure S2. Convex hull plot of formation energies of the binary Na–O system. Red-colored dashed line is for the original formation energies, and black-colored solid line is for the formation energies corrected with  $E_{\text{oxd}}^{\text{cor}}$ .

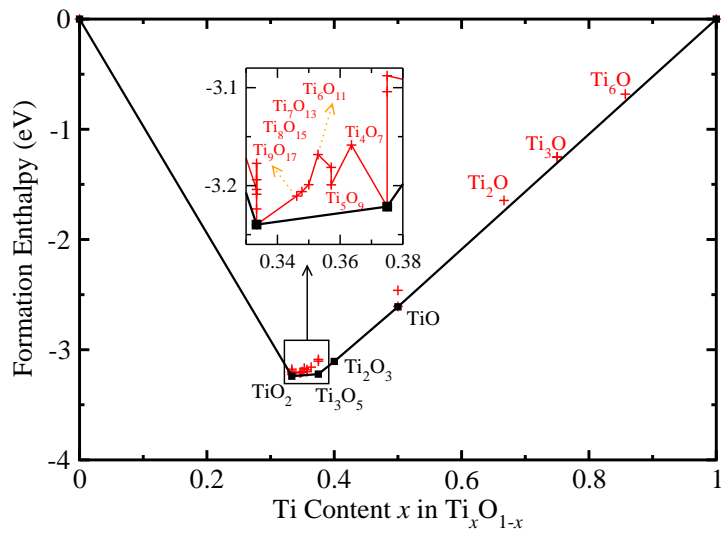

Figure S3. Convex hull plot of formation energies of the binary Ti–O system.

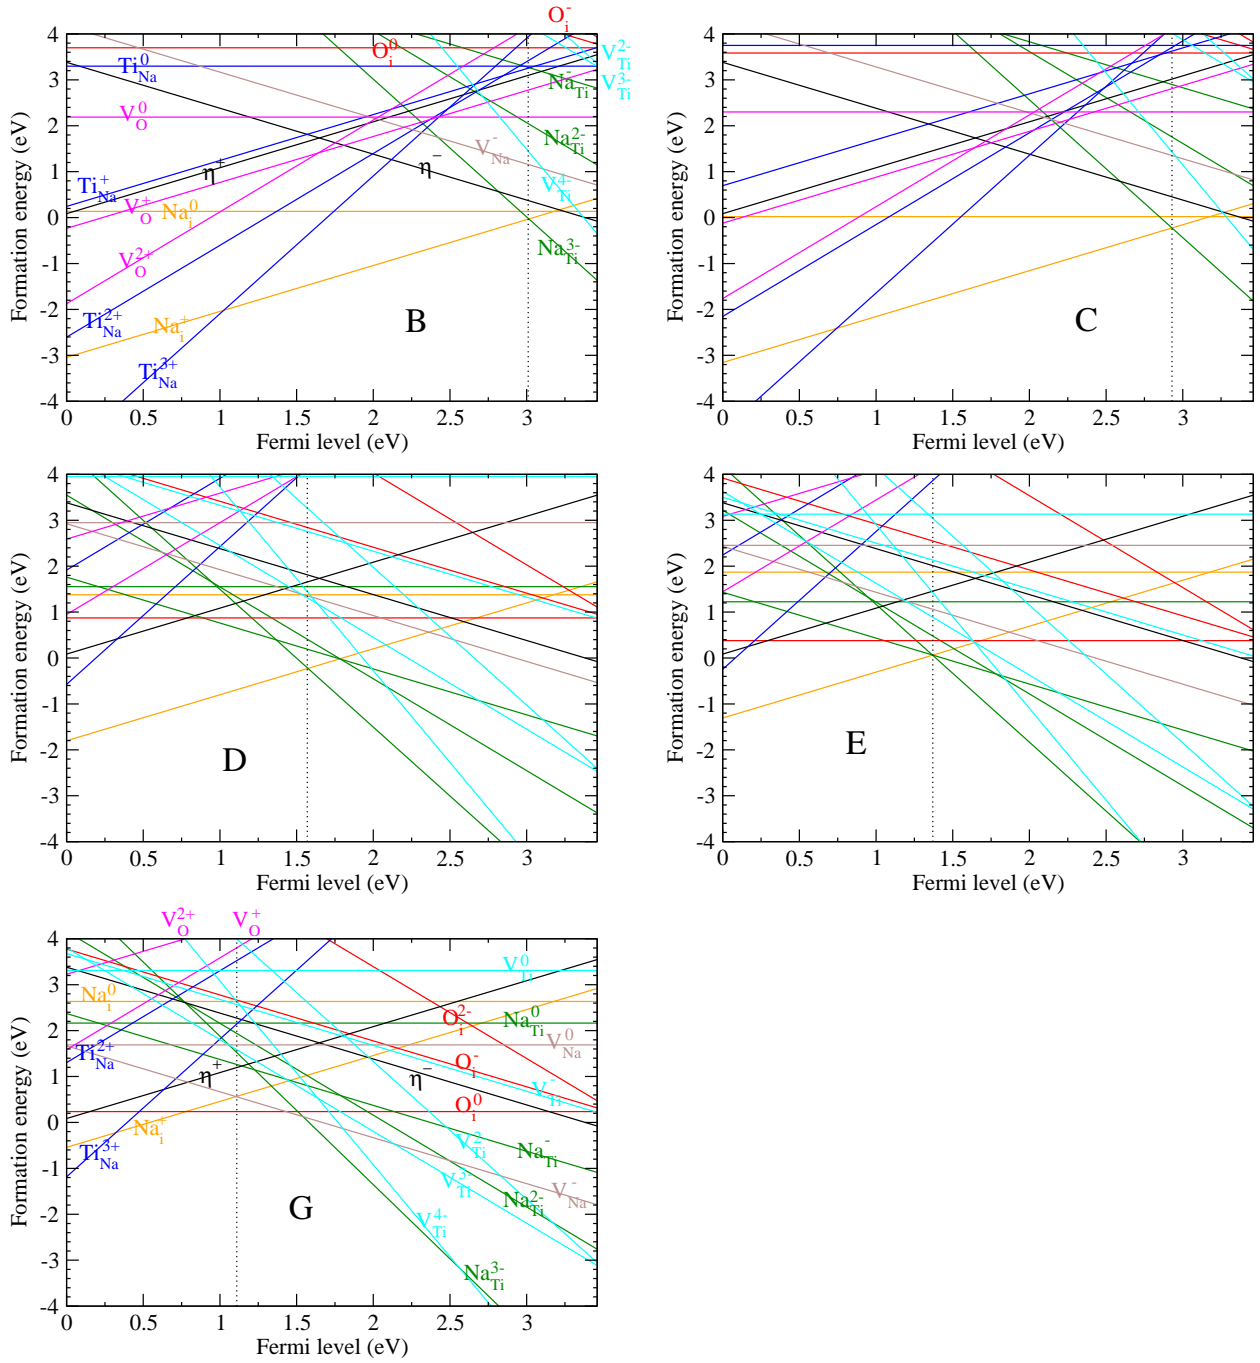

Figure S4. Calculated formation energies of intrinsic point defects with different sets of atomic chemical potentials at the corner points of stable polygon, B, C, D, E, and G.

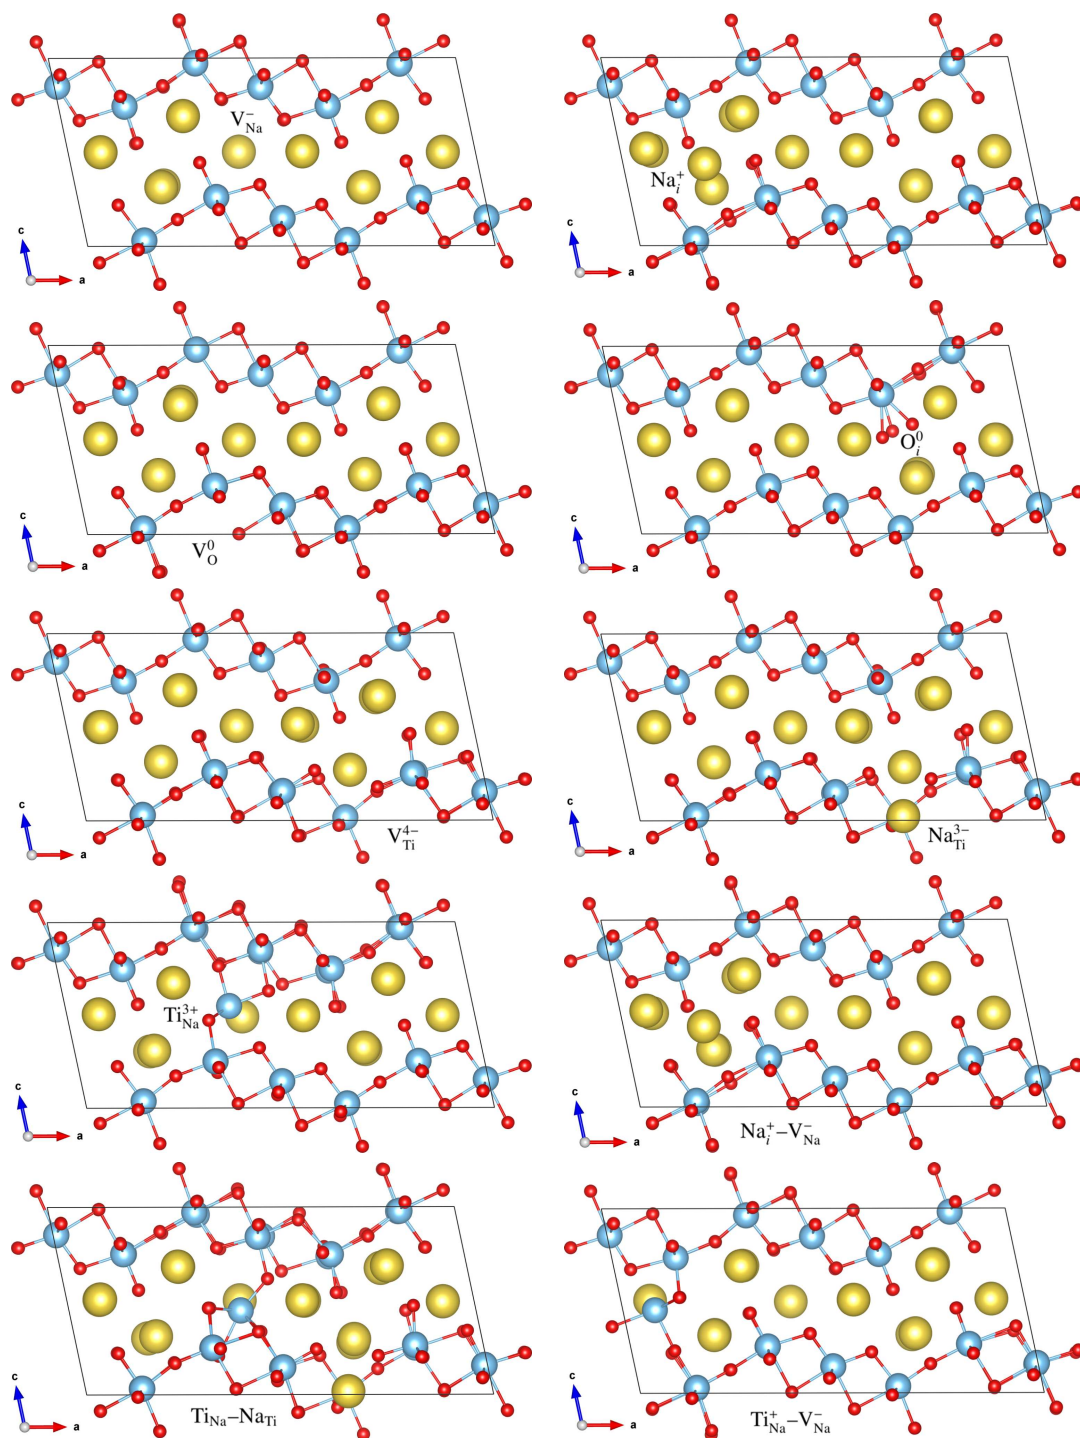

## References

- [1] H. Pan, X. Lu, X. Yu, Y.-S. Hu, H. Li, X.-Q. Yang, L. Chen, Sodium Storage and Transport Properties in Layered  $\text{Na}_2\text{Ti}_3\text{O}_7$  for Room-Temperature Sodium-Ion Batteries, *Adv. Energy Mater.* **3**, 1186–1194 (2013).
- [2] A. A. Araújo-Filho, F. L. R. Silva, A. Righi, M. B. da Silva, B. P. Silva, E. W. S. Caetano, V. N. Freire, Structural, Electronic and Optical Properties of Monoclinic  $\text{Na}_2\text{Ti}_3\text{O}_7$  from Density Functional Theory Calculations: a Comparison with XRD and Optical Absorption Measurements, *J. Solid State Chem.* **250**, 68–74 (2017).
- [3] M. W. Chase, Jr., *NIST-JANAF Thermochemical Tables*, Fourth Edition (J. Phys. Chem. Ref. Data, Monograph 9, 1998) pp. 11951.
- [4] *CRC Handbook of Chemistry and Physics*, Internet Version, D. R. Lide Ed.; CRC Press: <http://www.hbcpnetbase.com>, Boca Raton, FL (2005).
